# Supplementary material for: Aeroallergen Der p 2 promotes motility of human non-small cell lung cancer cells via toll-like receptor-mediated up-regulation of urokinase-type plasminogen activator and integrin/focal adhesion kinase signaling
Source: PubMed Central journal article supplement (PMC5355267; doi:10.18632/oncotarget.14514), 2017-01-05
Supplement: oncotarget-08-11316-s001.pdf [file oncotarget-08-11316-s001.pdf]

## Aeroallergen Der p 2 promotes motility of human non-small cell lung cancer cells via toll-like receptor-mediated up-regulation of urokinase-type plasminogen activator and integrin/focal adhesion kinase signaling

### Supplementary Materials

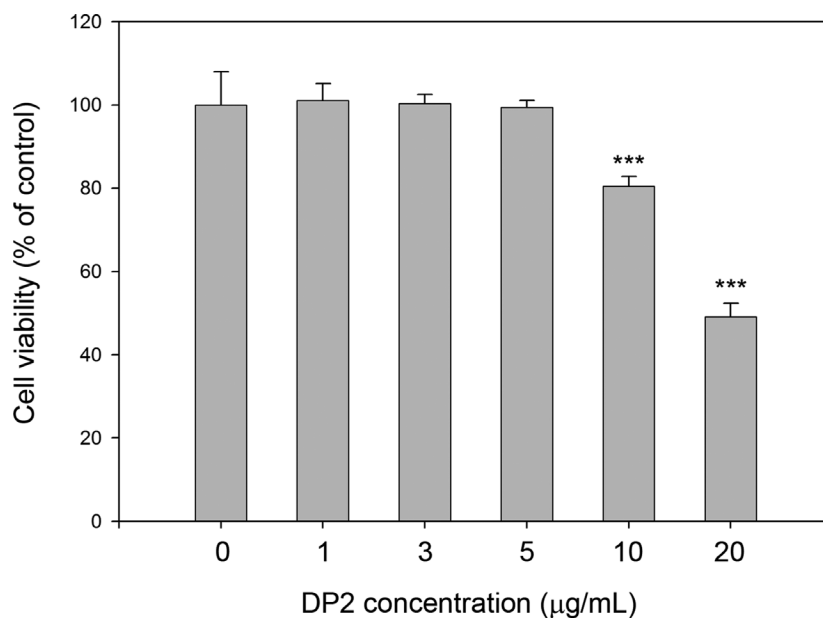

**Supplementary Figure 1: Effects of DP2 on cell viability of NSCLC A549 cell.** Cells at the density of  $10^5$  per mL were treated with a serial concentrations of DP2 as indicated for 24 hours. After the treatments, cell viability was assessed by using MTT assay and presented as percentage of control. \*\*\* $P < 0.005$  as compared to control.

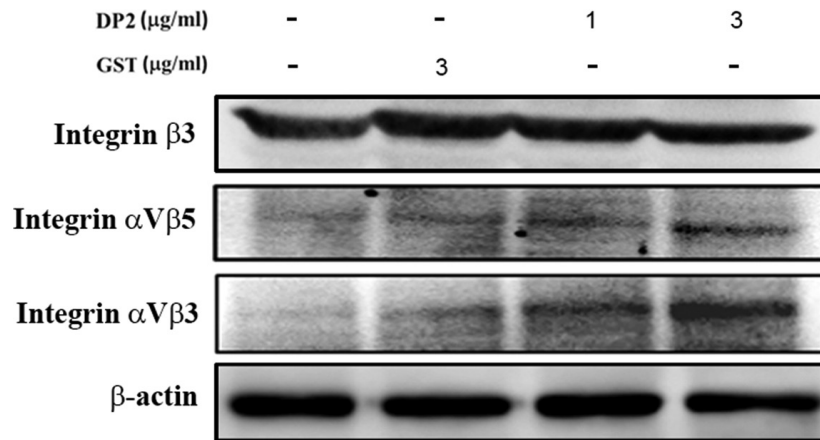

**Supplementary Figure 2: Effects of DP2 on expression level of integrin isoforms in NSCLC A549 cell.** Cells at the density of  $5 \times 10^5$  per mL were treated with 3 mg/mL GST, or 1 or 3 mg/mL DP2 for 24 hours. After the treatments, the cells were collected and lysed for immunodetection of integrin isoforms ( $\beta 3$ ,  $\alpha V\beta 5$ ,  $\alpha V\beta 3$ ) by using specific antibodies. Signal of  $\beta$ -actin was used as internal control.

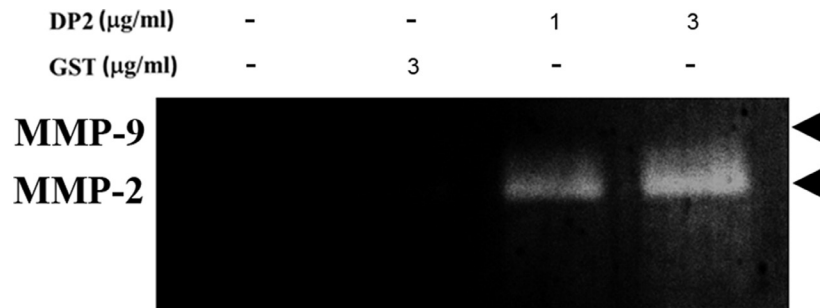

**Supplementary Figure 3: Effects of DP2 on enzymatic activity of MMP-2 and MMP-9 secreted by NSCLC A549 cell.** Cells at the density of  $5 \times 10^5$  per mL were treated with 3 μg/mL GST, or 1 or 3 μg/mL DP2 for 24 hours. After the treatments, the cultured medium were collected for MMP proteolytic activity by using zymography. MMP-2 and MMP-9 were indicated.
